# Supplementary material for: Identification of Intercellular Crosstalk between Decidual Cells and Niche Cells in Mice
Source: MDPI journal article supplement (doi:10.3390/ijms22147696), 2021-07-19
Supplement: s1 [file s1]

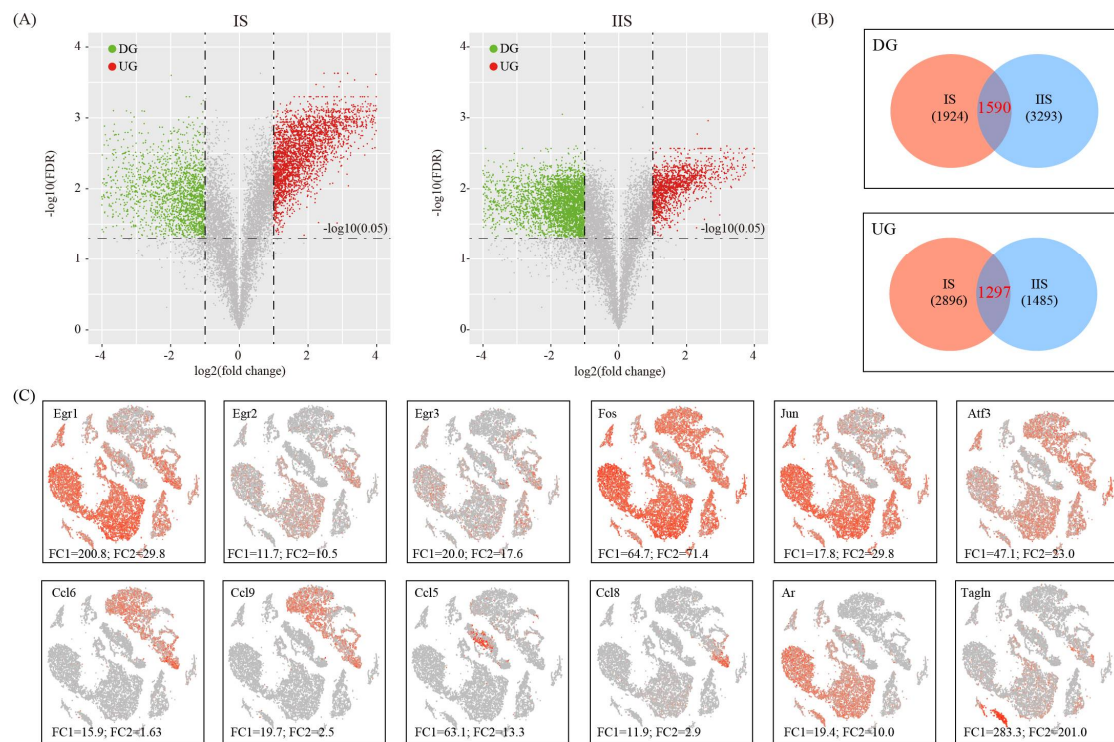

Figure S2. Comparison of single-cell RNA-seq data against parallel bulk RNA-seq data. (A) Volcano plot for the comparison between single-cell RNA-seq data and bulk RNA-seq data. IA and IIS were analyzed separately. Fold change  $>2$  and FDR  $<0.05$  were utilized to identify differentially expressed genes. DG, down-regulated genes; UP, up-regulated genes. (B) Venn plot showing the overlaps of differentially expressed genes. (C) TSNE plots showing the expression pattern of 12 selected up-regulated genes. FC1, fold change in IS; FC2, fold change in IIS.
