# Supplementary material for: Identification of Intercellular Crosstalk between Decidual Cells and Niche Cells in Mice
Source: MDPI journal article supplement (doi:10.3390/ijms22147696), 2021-07-19
Supplement: s1 [file s1]

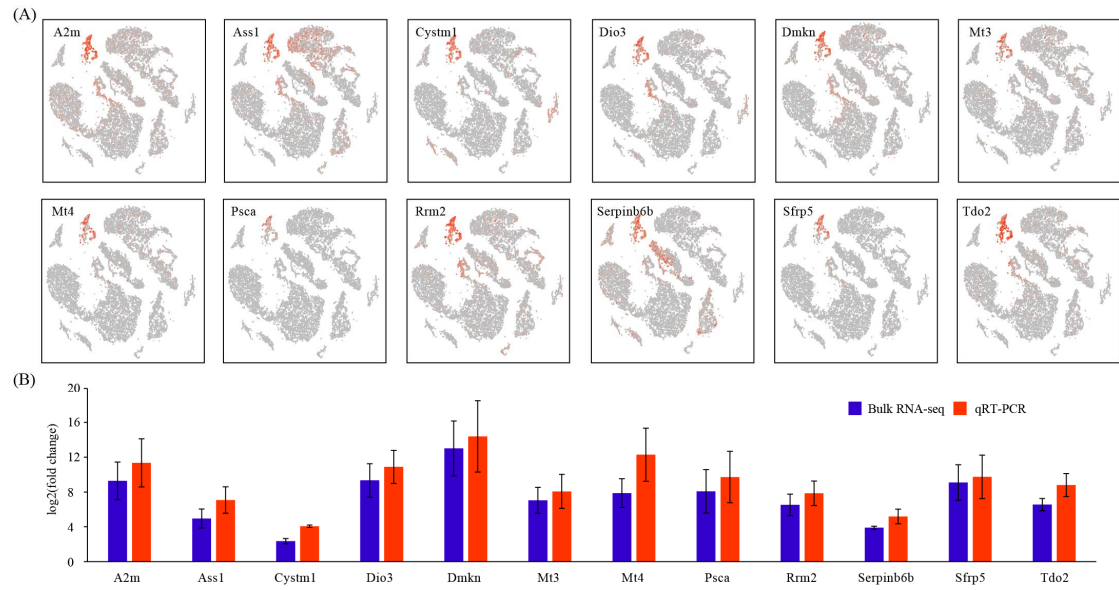

Figure S1. Validation of S3-enriched genes by quantitative RT-PCR. (A) TSNE plots showing the expression pattern of 12 selected genes. (B) Validation of selected genes by using qRT-PCR. Data obtained from qRT-PCR as well as bulk RNA-seq were displayed as mean  $\pm$  SEM (standard error of mean). According to the t-test,  $p < 0.05$  is true for all genes.  $n = 3$ .
